# Supplementary material for: Fecal microbiota in the female prairie vole (Microtus ochrogaster)
Source: PLoS One. 2018 Mar 26;13(3):e0190648. doi: 10.1371/journal.pone.0190648 (PMC5868765; doi:10.1371/journal.pone.0190648)
Supplement: S1 Table — Worksheet with information on the data analysis pipeline. (XLSX) [file pone.0190648.s001.xlsx]

## Sheet: Sheet1
S1 Table. Data analysis workflow. Worksheet with information on the data analysis pipeline.
Step	Software	Command/script	Option (other than default)	Figure/File
Fastq file generation with adapter/barcode trimming	Ion Torrent Suite	fastq creator
Import fastq files	CLC Genomics Workbench	import fastq	Ion Torrent
Quality trimming	CLC Genomics Workbench	trim sequences	limit=0.05, maxambig=2, length= 175-300nt
Add QIIME lables and combine individual fasta files	QIIME	add_qiime_labels.py	use mapping file with SampleIDs, InputFileName, and metadata
Alignment of combined fasta file	mothur	align.seqs	flip=T, r=silva.nr_v128.align
Get forward reads from combined fasta file	mothur	remove.seqs	use flip.accnos file
Rename resulting file to forward fasta file	mothur	system(mv filename new_filename)
Get reverse reads from combined fasta file	mothur	get.seqs	use flip.accnos file
Rename resulting file to reverse fasta file	mothur	system(mv filename new_filename)
Quality control of aligned sequences	mothur	screen.seqs of .align and .summary files	minlength=175
Map forward reads to E. coli 16S rRNA coordinates and variable regions	MS Excel	Open mothur forward alignment summary.seqs file in MS. Excel and use pivot table + ditribution scheme to assign reads to hypervariable regions	SILVA reference alignment coordinates to E. coli 16S rRNA coordinates translation	S2 Table; binning parameters see file S3 Table "VR Reads"
Map reverse reads to E. coli 16S rRNA coordinates and variable regions	MS Excel	Open mothur forward alignment summary.seqs file in MS. Excel and use pivot table + ditribution scheme to assign reads to hypervariable regions	SILVA reference alignment coordinates to E. coli 16S rRNA gene (SILVA accession AB035921) coordinates translation	S2 Table; binning parameters see file S3 Table "VR Reads"
Generate plots of forward and reverse reads	R package	ggplot2 using geom_segment		S1 Fig
Use MS Excel variable region mapping files as accnos input files in mothur to select forward and reverse reads of variable regions V2, V3, V4, V6-7, V8, and V9, respectively.	mothur	get.seqs	use variable region accnos files
Trim primer sequence from 5' end of all reads	CLC Genomics Workbench	import fasta and trim sequences	remove 20nt from 5' end
Import trimmed fasta files into QIIME; reverse complement reverse sequences	QIIME	adjust_seq_orientation.py
Identify chimeric sequences	QIIME	identify_chimeric_seqs.py	method: usearch61; reference: SILVA128/97_otus_16S.fasta
Remove chimeric sequences		filter_fasta.py	remove chimeras.txt sequences from fasta file
Merge forward-reverse fasta files for individual variable regions (V2, V3, V4, V6-7, V8, V9) and all variable regions (Vall)	mothur	merge.files
OTU picking - Open reference OTU picking using individual variable region fasta files (V2, V3, V4, V6-7, V8, V9)	QIIME	pick_open_reference_otus.py	method: usearch61 with the following parameters: pick_otus:enable_rev_strand_match True align_seqs:template_fp .../SILVA_128_QIIME_release/core_alignment/core_alignment_SILVA128.fna filter_alignment:allowed_gap_frac 0.80 filter_alignment:entropy_threshold 0.10 filter_alignment:suppress_lane_mask_filter True assign_taxonomy:assignment_method rdp assign_taxonomy:reference_seqs_fp .../SILVA_128_QIIM…
Remove spurious OTUs from the respective V2, V3, V4, V6-7, V8, V9 open-reference OTU tables (otu_table_mc2_w_tax_no_pynast_failures.biom) and the Vall closed-reference OTU table (otu_table.biom)	QIIME	filter_otus_from_otu_table.py	--min_count_fraction 0.00005
Summarize the filtered BIOM tables	QIIME	biom summarize-table
Perform core alpha and beta diversity analyses	QIIME	core_diversity_analyses.py	Parameters: -e value according to lowest read number in biom summarize-table output, alpha_diversity:metrics PD_whole_tree,shannon,observed_otus; categories for group analyses were chosen from sample mapping file columns	S3 Fig, S4 Table
Further processing of open reference OTU tables
Summarize taxa in L2 to L6 biom tables (see core diversity analysis taxa plots output files) with absolute values	QIIME	summarize_taxa.py	option -a
Use absolute value biom tables to sum OTUs across variable regions and prepare a summary L6 biom table	MS Excel	Sum, Average functions
Prepare L6 BIOM Version 1.0 table for use in MEGAN6	MS Excel	delete "D_[level]_"prefixes from SILVA taxonomy annotations
Prepare dendrogram with taxonomic and abundance information	MEGAN6 (version 6.6.7)	use SILVA 128 map and tree files for alternative taxomomy; import biom table and metadata; export tree file
Graph annotated dendrogram	GraPhlAn	graphlan.py, graphlan_annotate.py	Use MEGAN6 tree file and annotate tree (e.g., clade marker color, size, and ring annotations)	Fig 3
Further beta-diversity analyses
Prepare sample UPGMA trees from individual hypervariable regions	QIIME	jackknifed_beta_diversity.py
Plot sample trees	CLC Genomics Workbench	plot trees with node coloring according to bootstrap values	Use unweighted/weighted UPGMA tree files and jackknife support information from QIIME jackknife_beta_diversity.py output	S4 Fig
Generate boxplots to compare weighted and unweighted UniFrac distances for sibling pairs (two-sided Student's two sample t-test, non-parametric, Bonferroni-corrected p-values calculated using 1000 Monte Carlo permutations)	QIIME	make_distance_boxplots.py	category: sibling pairs, --supress_individual_within --supress_individual_between --safe_raw_data -n 1000	S5 Fig
Summarize taxa from EVEN biom tables to prepare taxonomy bar plot, sample tree and boxplot from summed OTU table	QIIME, MS Excel	MS Excel and QIIME biom convert script		Fig 4, S4 Table
Perform non-phylogenetic core alpha and beta diversity analyses	QIIME	core_diversity_analyses.py	Parameters: -e value according to lowest read number in biom summarize-table output, alpha_diversity:metrics chao1,observed_otus,shannon; beta-diversity: metric bary_curtis; categories for group analyses were chosen from sample mapping file columns
Prepare sample UPGMA trees from summed biom table	QIIME	jackknifed_beta_diversity.py	metric: bray_curtis	Fig 4
Generate boxplots to compare Bray-Curtis distances for sibling pairs (two-sided Student's two sample t-test, non-parametric, Bonferroni-corrected p-values calculated using 1000 Monte Carlo permutations)	QIIME	make_distance_boxplots.py	category: sibling pairs, --supress_individual_within --supress_individual_between --safe_raw_data -n 1000	Fig 4
Compare abundances of individual taxa at genus level between sibling pairs	STAMP	Bar plot	ANOVA, Games-Howell post-hoc tests with Bonferroni multiple comparison correction	Fig 5
