# Supplementary material for: Fecal microbiota in the female prairie vole (Microtus ochrogaster)
Source: PLoS One. 2018 Mar 26;13(3):e0190648. doi: 10.1371/journal.pone.0190648 (PMC5868765; doi:10.1371/journal.pone.0190648)
Supplement: S3 Table — Binning parameters for forward/reverse read assignments to hypervariable regions are shown as E. coli 16S rRNA coordinates (for details see Material & methods). (XLSX) [file pone.0190648.s003.xlsx]

## Sheet: S3 Table. Reads by HVR
S3 Table. Read assignments by hypervariable region before/after removal of sequence chimeras and combining of forward and reverse reads. Binning parameters for forward/reverse read assignments to hypervariable regions are shown as E. coli 16S rRNA coordinates (for details see Material & Methods).
Hypervariable Region	Direction	Binning Start (E. coli 16S rRNA position)	Binning Stop (E. coli 16S rRNA position)	Total Number of Reads	After Chimera Removal	Average Read Length [nt]	StDev	Forward and Reverse (FR) Reads Combined	Average FR Read Length [nt]	FR StDev	Percentage
V2	forward		£ 380	13729	13627	227.102	19.8833	24304	225.795	21.0245	2.388
	reverse		£ 380	10756	10677	224.128	22.2858
V3	forward	³ 200	£ 600	171160	170701	183.032	11.1969	331681	182.583	11.2543	32.5894
	reverse	³ 200	£ 600	161728	160980	182.107	11.2953
V4	forward	³ 450	£ 800	45618	44982	256.399	25.9532	80713	251.381	30.7376	7.93049
	reverse	³ 450	£ 800	36209	35731	245.062	34.8515
V6-7	forward	³ 850	£ 1210	85877	82126	224.661	25.7191	209266	228.286	22.9125	20.5615
	reverse	³ 850	£ 1210	135780	127140	230.627	20.5632
V8	forward	³ 1000	£ 1370	182460	180024	251.662	33.7343	347434	253.479	32.9807	34.1373
	reverse	³ 1000	£ 1370	170255	167410	255.433	32.0359
V9	forward	³ 1200		8928	8928	193.765	8.5783	24358	195.557	7.494	2.3933
	reverse	³ 1200		15443	15430	196.594	6.5684
Sum or Average and StDev				1037943	1017756	222.548	27.5909	1017756	222.981	28.8329	100
