# Supplementary material for: Fecal microbiota in the female prairie vole (Microtus ochrogaster)
Source: PLOS journal article supplement (doi:10.1371/journal.pone.0190648), 2018-03-26
Supplement: S8 (10.1371/journal.pone.0190648.s008) [file journal.pone.0190648.s008]

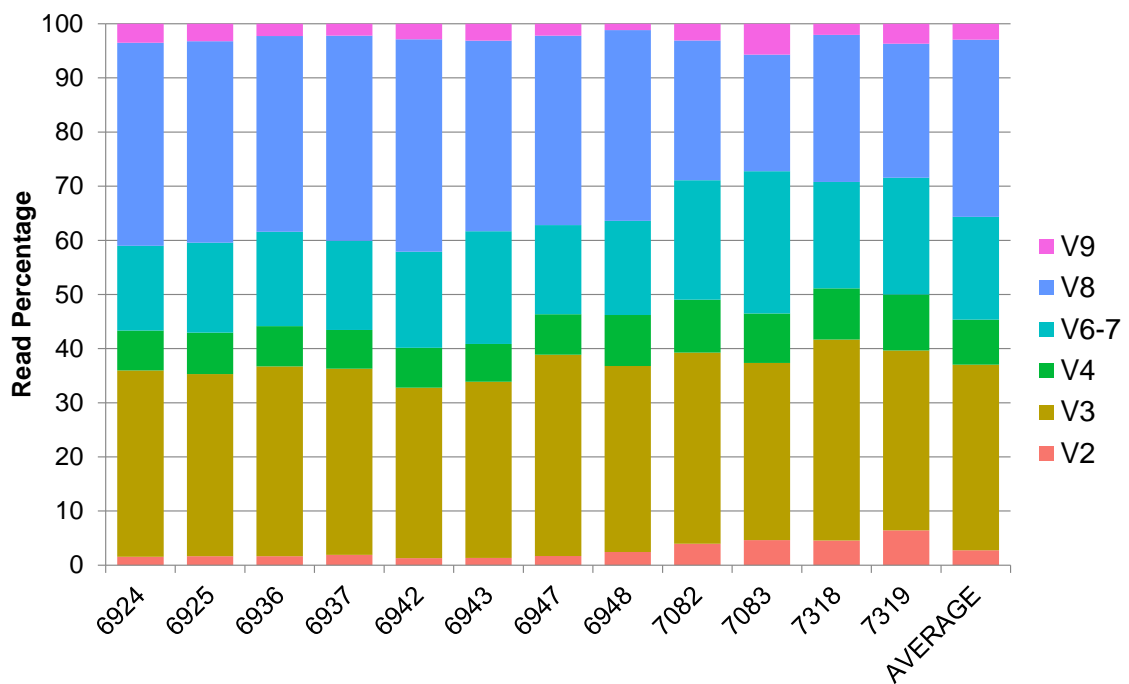

**S2 Fig. Individual sample and average read distribution by 16S rRNA gene hypervariable region.** The stacked bars are color-coded according to hypervariable region.
